# Supplementary material for: Loss of Parp-1 affects gene expression profile in a genome-wide manner in ES cells and liver cells
Source: PubMed Central journal article supplement (PMC1810537; doi:10.1186/1471-2164-8-41), 2007-02-07
Supplement: 1471-2164-8-41-S1.pdf [file 1471-2164-8-41-S1.pdf]

Table S1. Primers used in this study

| Gene           | Forward primer (5'-3') | Reverse primer (5'-3')    | Product size (bp) | Annealing temperature (°C) | Cycle no. | Reference  |
|----------------|------------------------|---------------------------|-------------------|----------------------------|-----------|------------|
| <i>H19</i>     | CATGTCTGGGCCTTTGAA     | TTGGCTCCAGGATGATGT        | 245               | 60                         | 22, 24    | 1          |
| <i>Igf2</i>    | AGGGGAGCTTGTGACACG     | GGGTATCTGGGGAAGTCGTC      | 225               | 60                         | 22, 24    | 1          |
| <i>Cdx2</i>    | AGGCTGAGCCATGAGGAGTA   | TGAGGTCCATAATTCCACTCA     | 114               | 60                         | 30        | 2          |
| <i>Plf</i>     | CTCTGCAGAGATGCTCCCTTC  | CATGATATTTTCAGAAGCAGAGCAC | 721               | 68                         | 40        | 3          |
| <i>Oct 3/4</i> | CAACGAGAAGAGTATGAGGC   | AAGCTCCAGGTTCTCTTGTC      | 267               | 60                         | 18        | This study |
| <i>Gapdh</i>   | TGGTGAAGGTCGGTGTGAAC   | AGGGGTCGTTGATGGCAACA      | 103               | 60                         | 20        | This study |

- Ogawa H, Ono Y, Shimosato N, Sotomaru Y, Katsuzawa Y, Hiura H, Ito M, Kono T: **Disruption of imprinting in cloned mouse fetuses from embryonic stem cells.** *Reproduction* 2003, **126**:549-557.
- Niwa H, Toyooka Y, Shimosato D, Strumpf D, Takahashi K, Yagi R, Rossant J: **Interaction between Oct3/4 and Cdx2 determines trophectoderm differentiation.** *Cell* 2005, **123**:917-929.
- Fang Y, Lepont P, Fassett JT, Ford SP, Mubaidin A, Hamilton RT, Nilsen-Hamilton M: **Signaling between the placenta and the uterus involving the mitogen-regulated protein/proliferins.** *Endocrinology* 1999, **140**:5239-5249.
